# Supplementary material for: Timing of Mental Health Treatment and PTSD Symptom Improvement Among Iraq and Afghanistan Veterans
Source: Atypon-hosted journal article supplement (doi:10.1176/appi.ps.201300453), 2014-08-01
Supplement: appi.ps.201300453.ds001.pdf [file appi.ps.201300453.ds001.pdf]

Supplementary Table 1. Validity of mapping of PCL to the PC-PTSD

| <b>PC-PTSD Question (yes/no)</b>                                                                         | <b>Corresponding PCL Questions (either response rated moderately or above)</b>                                        | <b>Percent Agreement (n=57,889 screens given on same date)</b> |
|----------------------------------------------------------------------------------------------------------|-----------------------------------------------------------------------------------------------------------------------|----------------------------------------------------------------|
| 1. Have had nightmares about it or thought about it when you did not want to?                            | 1. Repeated, disturbing memories, thoughts, or images of a stressful experience from the past?                        | 81.2                                                           |
|                                                                                                          | 2. Repeated, disturbing dreams of a stressful experience from the past?                                               |                                                                |
| 2. Tried hard not to think about it or went out of your way to avoid situations that reminded you of it? | 6. Avoid thinking about or talking about a stressful experience from the past or avoid having feelings related to it? | 81.5                                                           |
|                                                                                                          | 7. Avoid activities or situations because they remind you of a stressful experience from the past?                    |                                                                |
| 3. Were constantly on guard, watchful, or easily startled?                                               | 16. Being “super alert” or watchful on guard?                                                                         | 85.8                                                           |
|                                                                                                          | 17. Feeling jumpy or easily startled?                                                                                 |                                                                |
| 4. Felt numb or detached from others, activities, or your surroundings?                                  | 10. Feeling distant or cut off from other people?                                                                     | 82.0                                                           |
|                                                                                                          | 11. Feeling emotionally numb or being unable to have loving feelings for those close to you?                          |                                                                |
| Overall screen result (>2 symptoms endorsed)                                                             | Overall screen result (>2 symptoms endorsed)                                                                          | 82.5                                                           |
